# Supplementary material
Source: PubMed Central journal article supplement (PMC5607411)
Supplement: IAI.00303-17_zii999092174s1.pdf [file IAI.00303-17_zii999092174s1.pdf]

**Table S1. Bacterial strains and primers included in this study.**

| Strains of <i>Lactobacillus</i> spp.                  | Description                                                                                                               | Reference          |
|-------------------------------------------------------|---------------------------------------------------------------------------------------------------------------------------|--------------------|
| <i>L. casei</i> LC-39                                 | Infant fecal isolate                                                                                                      | (1)                |
| <i>L. gasseri</i> LG-3                                | Infant fecal isolate                                                                                                      | (2)                |
| <i>L. rhamnosus</i> LR-34                             | Infant fecal isolate                                                                                                      | (1)                |
| <i>L. reuteri</i> DSM 17938                           | Daughter strain derived from <i>L. reuteri</i> ATCC 55730, a Peruvian mother's breastmilk isolate                         | Biogaia AB;<br>(3) |
| <i>L. reuteri</i> DSM 17938:: <i>pocR</i>             | Insertional mutation in the <i>pocR</i> gene, ErmR                                                                        | (4)                |
| <i>L. reuteri</i> DSM 17938:: <i>gdh</i>              | Insertional mutation in the <i>gdh</i> gene, ErmR                                                                         | This study         |
| <i>L. reuteri</i> ATCC PTA 6475                       | Isolate from Finnish mother's milk                                                                                        | BioGaia AB         |
| <i>L. reuteri</i> ATCC PTA 6475:: <i>pocR</i>         | Insertional mutation in the <i>pocR</i> gene, ErmR                                                                        | (5)                |
| <i>L. reuteri</i> ATCC PTA 6475:: <i>pocR</i> pJKS100 | Contains an insertional mutation in the <i>pocR</i> gene and an empty <i>E. coli-L. reuteri</i> shuttle vector, ErmR, CmR | (5)                |

|                                                                                         |                                                                                                                      |               |
|-----------------------------------------------------------------------------------------|----------------------------------------------------------------------------------------------------------------------|---------------|
| <i>L. reuteri</i> ATCC PTA 6475:: <i>pocR</i><br>pJKS102                                | Insertional mutation in the <i>pocR</i> gene and a complementation vector containing the <i>pocR</i> gene, ErmR, CmR | (5)           |
| <i>L. reuteri</i> ATCC PTA 6475:: <i>gdh</i><br>(Also known as <i>L. reuteri</i> PRB94) | Insertional mutation in the <i>gdh</i> gene, ErmR                                                                    | (6)           |
| <b>Pathogenic <i>C. difficile</i> strains</b>                                           | <b>Description</b>                                                                                                   | <b>Source</b> |
| CD2015                                                                                  | NAP1/027 clinical isolate from CDI patient stool                                                                     | (7)           |
| R20291                                                                                  | NAP1/027 clinical isolate from CDI patient stool                                                                     | (8)           |
| VPI 10463                                                                               | Ribotype 087, hyper-virulent, lab-adapted strain                                                                     | (9)           |
| 630                                                                                     | Ribotype 012, lab-adapted, less virulent strain                                                                      | (10)          |
| <b>Primers</b>                                                                          | <b>Primer sequence (5' – 3'), description</b>                                                                        | <b>Source</b> |
| <i>C. difficile</i> 16S rRNA gene gene                                                  | F: TTGAGCGATTTACTTCGGTAAAGA<br>R: CCATCCTGTACTGGCTCACCT                                                              | (11)          |
| Universal 16S rRNA gene gene                                                            | F: GCAGGCCTAACACATGCAAGTC<br>R: CTGCTGCCTCCCGTAGGAGT                                                                 | (12)          |

ErmR = erythromycin resistant; CmR = chloramphenicol resistant

1. **Boonma P, Spinler JK, Venable SF, Versalovic J, Tumwasorn S.** 2014. *Lactobacillus rhamnosus* L34 and *Lactobacillus casei* L39 suppress *Clostridium difficile*-induced IL-8 production by colonic epithelial cells. *BMC Microbiol* **14**:177.
2. **Boonma P.** 2014. Role of *Lactobacillus* in the suppression of *Clostridium difficile*-induced IL-8 production in colonic epithelial cells. (Ph.D. thesis) Chulalongkorn University, Bangkok.
3. **Rosander A, Connolly E, Roos S.** 2008. Removal of antibiotic resistance gene-carrying plasmids from *Lactobacillus reuteri* ATCC 55730 and characterization of the resulting daughter strain, *L. reuteri* DSM 17938. *Appl Environ Microbiol* **74**:6032-6040.
4. **Spinler JK, Sontakke A, Hollister EB, Venable SF, Oh PL, Balderas MA, Saulnier DM, Mistretta TA, Devaraj S, Walter J, Versalovic J, Highlander SK.** 2014. From prediction to function using evolutionary genomics: human-specific ecotypes of *Lactobacillus reuteri* have diverse probiotic functions. *Genome Biol Evol* **6**:1772-1789.
5. **Santos F, Spinler JK, Saulnier DM, Molenaar D, Teusink B, de Vos WM, Versalovic J, Hugenholtz J.** 2011. Functional identification in *Lactobacillus reuteri* of a PoxR-like transcription factor regulating glycerol utilization and vitamin B12 synthesis. *Microb Cell Fact* **10**:55.
6. **Schaefer L, Auchtung TA, Hermans KE, Whitehead D, Borhan B, Britton RA.** 2010. The antimicrobial compound reuterin (3-hydroxypropionaldehyde) induces oxidative stress via interaction with thiol groups. *Microbiology* **156**:1589-1599.
7. **Robinson CD, Auchtung JM, Collins J, Britton RA.** 2014. Epidemic *Clostridium difficile* strains demonstrate increased competitive fitness compared to nonepidemic isolates. *Infect Immun* **82**:2815-2825.
8. **Stabler RA, He M, Dawson L, Martin M, Valiente E, Corton C, Lawley TD, Sebahia M, Quail MA, Rose G, Gerding DN, Gibert M, Popoff MR, Parkhill J, Dougan G, Wren BW.** 2009. Comparative genome and phenotypic analysis of *Clostridium difficile* O27 strains provides insight into the evolution of a hypervirulent bacterium. *Genome biology* **10**:R102.
9. **Hammond GA, Johnson JL.** 1995. The toxigenic element of *Clostridium difficile* strain VPI 10463. *Microbial pathogenesis* **19**:203-213.
10. **Sebahia M, Wren BW, Mullany P, Fairweather NF, Minton N, Stabler R, Thomson NR, Roberts AP, Cerdeno-Tarraga AM, Wang H, Holden MT, Wright A, Churcher C, Quail MA, Baker S, Bason N, Brooks K, Chillingworth T, Cronin A, Davis P, Dowd L, Fraser A, Feltwell T, Hance Z, Holroyd S, Jagels K, Moule S, Mungall K, Price C, Rabinowitsch E, Sharp S, Simmonds M, Stevens K, Unwin L, Whithead S, Dupuy B, Dougan G, Barrell B, Parkhill J.** 2006. The multidrug-resistant human pathogen *Clostridium difficile* has a highly mobile, mosaic genome. *Nature genetics* **38**:779-786.
11. **Rinttila T, Kassinen A, Malinen E, Krogus L, Palva A.** 2004. Development of an extensive set of 16S rDNA-targeted primers for quantification of pathogenic and indigenous bacteria in faecal samples by real-time PCR. *J Appl Microbiol* **97**:1166-1177.
12. **Castillo M, Martin-Orue SM, Manzanilla EG, Badiola I, Martin M, Gasa J.** 2006. Quantification of total bacteria, enterobacteria and lactobacilli populations in pig digesta by real-time PCR. *Vet Microbiol* **114**:165-170.

**Table S2. Sample identifiers and barcode sequences.**

| #SampleID          | BarcodeSequence | #SampleID               | BarcodeSequence |
|--------------------|-----------------|-------------------------|-----------------|
| 0714.REUT1B.A110.1 | ACACTCATACT     | 0714.REUT1B.C723.1      | ACACAGTGAGT     |
| 0714.REUT1B.A112.1 | ACACGTAGTAT     | 0714.REUT1B.C810.1      | ACGAGCGCGCT     |
| 0714.REUT1B.A114.1 | ACTCGCGTCGT     | 0714.REUT1B.C812.1      | ACGTA CTGTGT    |
| 0714.REUT1B.A115.1 | CGACGAGTACT     | 0714.REUT1B.C814.1      | AGTGTAGTAGT     |
| 0714.REUT1B.A116.1 | ACAGACTATAT     | 0714.REUT1B.C815.1      | GTGTACGACGT     |
| 0714.REUT1B.A119.1 | ACGACACGTAT     | 0714.REUT1B.C816.1      | ACGCGAGAGAT     |
| 0714.REUT1B.A121.1 | AGTACGAGAGT     | 0714.REUT1B.C819.1      | ACTACGTCTCT     |
| 0714.REUT1B.A123.1 | CGTACGTCGAT     | 0714.REUT1B.C821.1      | CAGTACGTA CT    |
| 0714.REUT1B.A210.1 | ACAGACAGCGT     | 0714.REUT1B.C823.1      | ACACTCATACT     |
| 0714.REUT1B.A212.1 | ACACTACTCGT     | 0714.REUT1B.C910.1      | ACGATGAGTGT     |
| 0714.REUT1B.A214.1 | AGACTCGACGT     | 0714.REUT1B.C912.1      | ACGTAGATCGT     |
| 0714.REUT1B.A215.1 | CGATACTACGT     | 0714.REUT1B.C914.1      | ATAGTATACGT     |
| 0714.REUT1B.A216.1 | ACAGAGACTCT     | 0714.REUT1B.C915.1      | ACACAGTGAGT     |
| 0714.REUT1B.A219.1 | ACGAGTAGACT     | 0714.REUT1B.C916.1      | ACACGACGACT     |
| 0714.REUT1B.A221.1 | AGTACTACTAT     | 0714.REUT1B.C919.1      | ACTATACGAGT     |
| 0714.REUT1B.A223.1 | CTACTCGTAGT     | 0714.REUT1B.C921.1      | CGACGACGCGT     |
| 0714.REUT1B.A310.1 | ACAGACTATAT     | 0714.REUT1B.C923.1      | ACAGACAGCGT     |
| 0714.REUT1B.A312.1 | ACGACACGTAT     | 0714.REUT1B.D1010.1     | ACGCGAGAGAT     |
| 0714.REUT1B.A314.1 | AGTACGAGAGT     | 0714.REUT1B.D1012.1     | ACTACGTCTCT     |
| 0714.REUT1B.A315.1 | CGTACGTCGAT     | 0714.REUT1B.D1014.1     | CAGTACGTA CT    |
| 0714.REUT1B.A316.1 | ACAGCTCGTGT     | 0714.REUT1B.D1015.1     | ACACTCATACT     |
| 0714.REUT1B.A319.1 | ACGCGTCTAGT     | 0714.REUT1B.D1016.1     | ACACGTAGTAT     |
| 0714.REUT1B.A321.1 | AGTAGACGTCT     | 0714.REUT1B.D1019.1     | ACTCGCGTCGT     |
| 0714.REUT1B.A323.1 | GTACAGTACGT     | 0714.REUT1B.D1021.1     | CGACGAGTACT     |
| 0714.REUT1B.B410.1 | ACAGAGACTCT     | 0714.REUT1B.D1023.1     | ACAGACTATAT     |
| 0714.REUT1B.B412.1 | ACGAGTAGACT     | 0714.REUT1B.D1210.1     | ACACGACGACT     |
| 0714.REUT1B.B414.1 | AGTACTACTAT     | 0714.REUT1B.D1212.1     | ACTATACGAGT     |
| 0714.REUT1B.B415.1 | CTACTCGTAGT     | 0714.REUT1B.D1214.1     | CGACGACGCGT     |
| 0714.REUT1B.B416.1 | ACAGTGTCGAT     | 0714.REUT1B.D1215.1     | ACAGACAGCGT     |
| 0714.REUT1B.B419.1 | ACGTACACACT     | 0714.REUT1B.D1216.1     | ACACTACTCGT     |
| 0714.REUT1B.B421.1 | AGTCGTACACT     | 0714.REUT1B.D1219.1     | AGACTCGACGT     |
| 0714.REUT1B.B423.1 | GTCGTACGTAT     | 0714.REUT1B.D1221.1     | CGATACTACGT     |
| 0714.REUT1B.B610.1 | ACAGCTCGTGT     | 0714.REUT1B.D1223.1     | ACAGAGACTCT     |
| 0714.REUT1B.B612.1 | ACGCGTCTAGT     | 0714.REUT1B.FS8.1.2.1   | GTGTACGACGT     |
| 0714.REUT1B.B614.1 | AGTAGACGTCT     | 0714.REUT1B.FS8.2.2.1   | ACACAGTGAGT     |
| 0714.REUT1B.B615.1 | GTACAGTACGT     | 0914.REUTB1.QC911B.1    | ACAGCTCGTGT     |
| 0714.REUT1B.B616.1 | ACGAGCGCGCT     | 0914.REUTB1.QC914B.1    | ACAGTGTCGAT     |
| 0714.REUT1B.B619.1 | ACGTACTGTGT     | 0914.REUTB1.QC916B.1    | ACGAGCGCGCT     |
| 0714.REUT1B.B621.1 | AGTGTA GTAGT    | 0914.REUTB1.QC923B.1    | ACGATGAGTGT     |
| 0714.REUT1B.B623.1 | GTGTACGACGT     | 1012.IMTUC.D001.C1.1.R2 | CTATATGTCGT     |
| 0714.REUT1B.C710.1 | ACAGTGTCGAT     | 1012.IMTUC.D001.C1.1.R3 | CTATCGACACT     |
| 0714.REUT1B.C712.1 | ACGTACACACT     | 1012.IMTUC.D001.C1.1.R4 | CTATGTAGAGT     |
| 0714.REUT1B.C714.1 | AGTCGTACACT     | 1014.NTCR2.V3V5.MID39   | ACGCTCTCTCT     |
| 0714.REUT1B.C715.1 | GTCGTACGTAT     | 1014.NTCR3.V3V5.MID39   | ACGCTCTCTCT     |
| 0714.REUT1B.C716.1 | ACGATGAGTGT     | 1014.NTCR4.V3V5.MID38   | ACGCGAGAGAT     |
| 0714.REUT1B.C719.1 | ACGTAGATCGT     |                         |                 |
| 0714.REUT1B.C721.1 | ATAGTATACGT     |                         |                 |

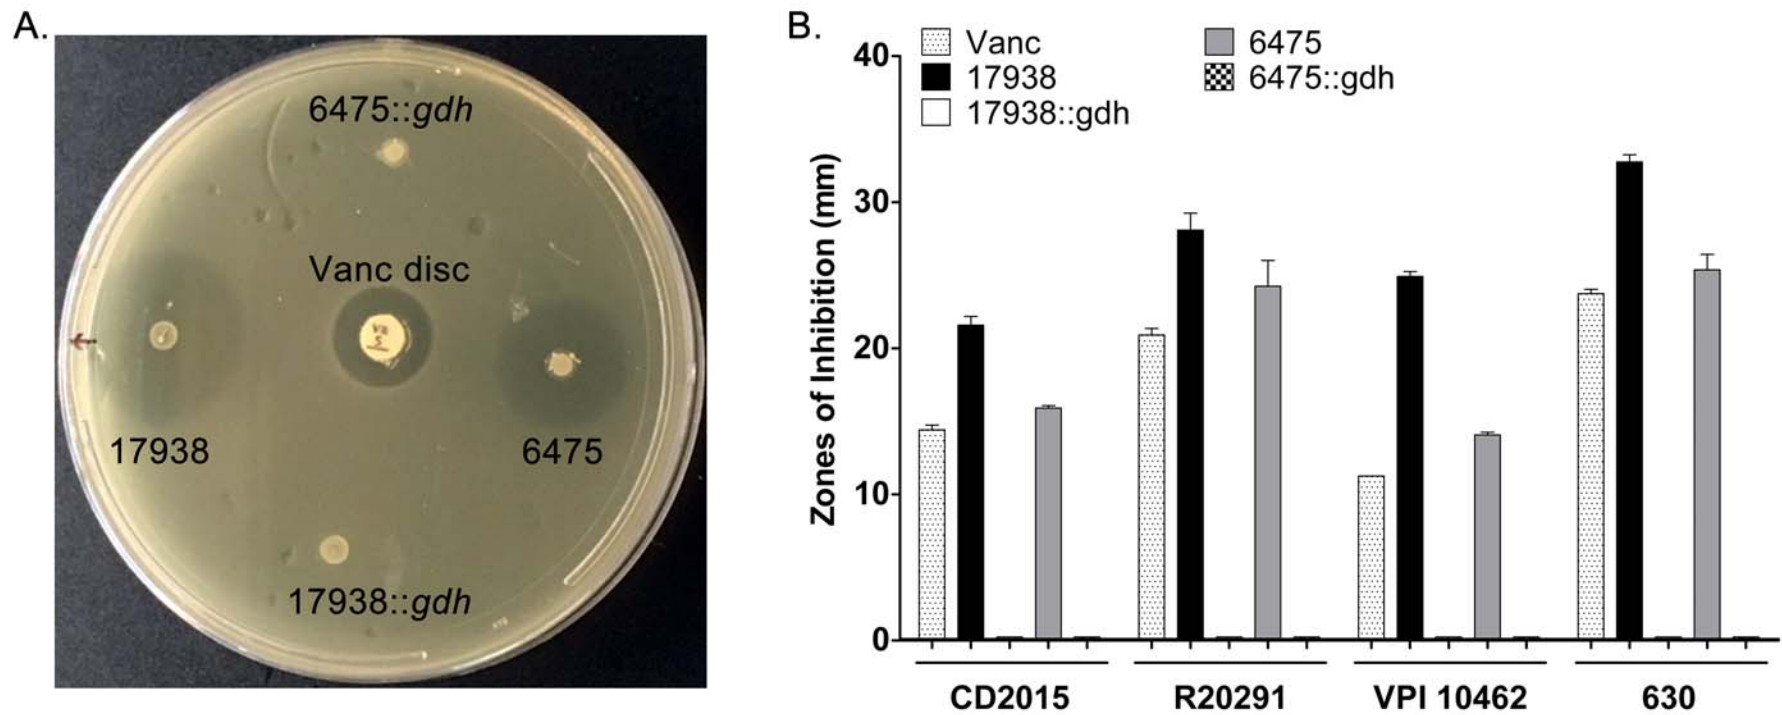

**Figure S1. Reuterin-dependent *C. difficile* inhibition requires the glycerol dehydratase (*gdh*) gene.** Spots of *L. reuteri* strains and a vancomycin disc (5 ug) were overlain with *C. difficile* to assess the effect of the inactivated *gdh* gene on *C. difficile* growth. Clear zones of inhibition were measured (mm). A) Representative image of the pathogen overlay assay showing clear zones where *C. difficile* CD2015 was inhibited. Wildtype *L. reuteri* 17938 and 6475 and isogenic *gdh* insertion mutants (17938::*gdh* and 6475:*gdh*) are shown. B) Bar graph representing zone of inhibition measurements (mm). Results represent the mean +/- S.E.M., n=3.

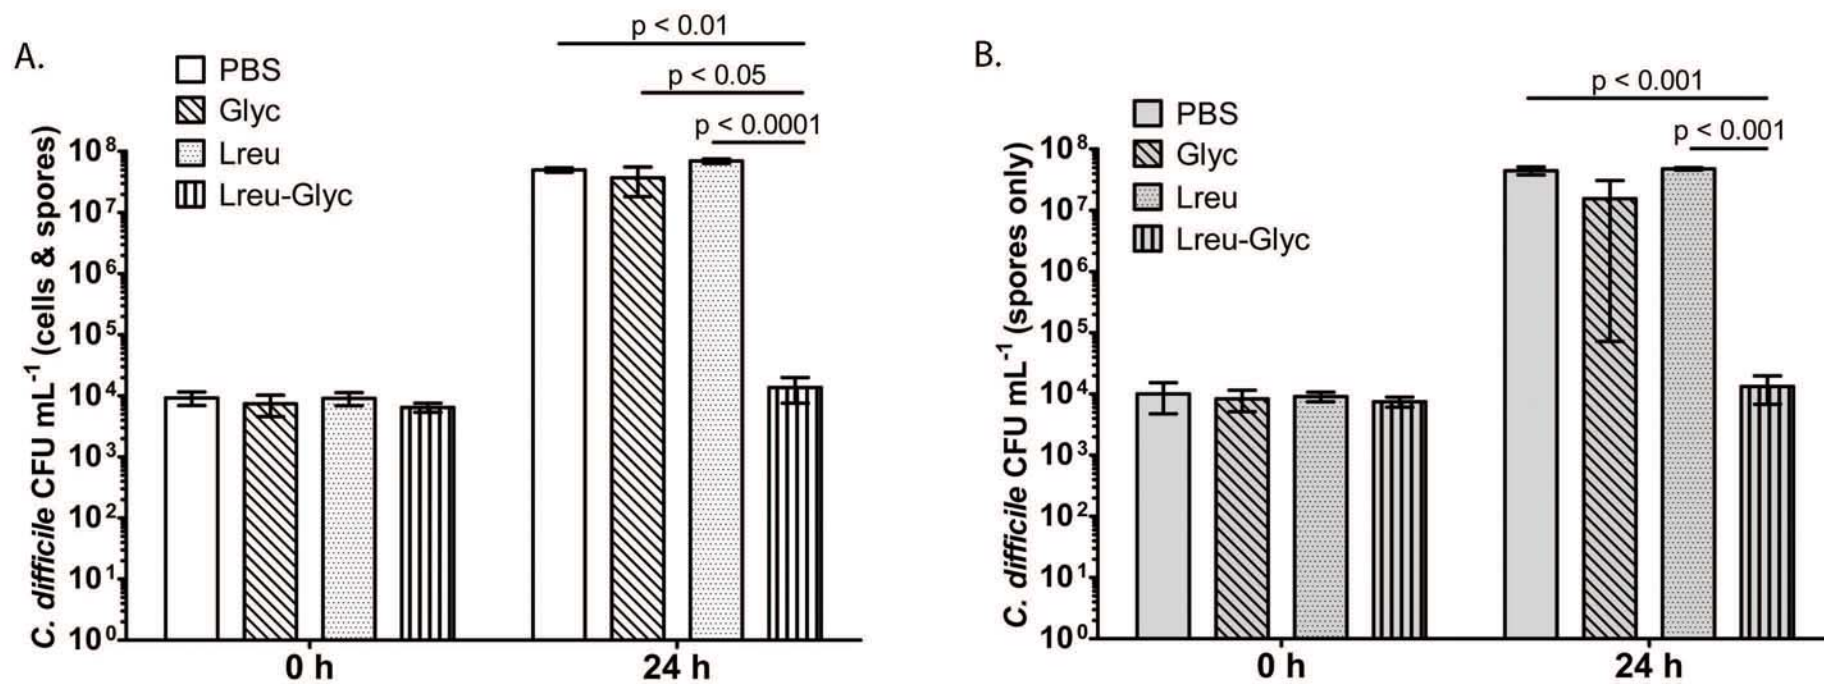

**Figure S2. Ex vivo analysis of glycerol-dependent *L. reuteri*-mediated growth inhibition of *C. difficile*.** Ex vivo germination and outgrowth of *C. difficile* VPI 10463 spores were measured in cecal contents from germ-free mice (n = 3 mice per group). Results for (A) spores and vegetative cells and (B) spores alone that outgrew after incubation for 24 h. Data represent the mean +/- S.E.M. Significance between groups was determined by using two-way ANOVA with Bonferroni multiple-comparison correction.

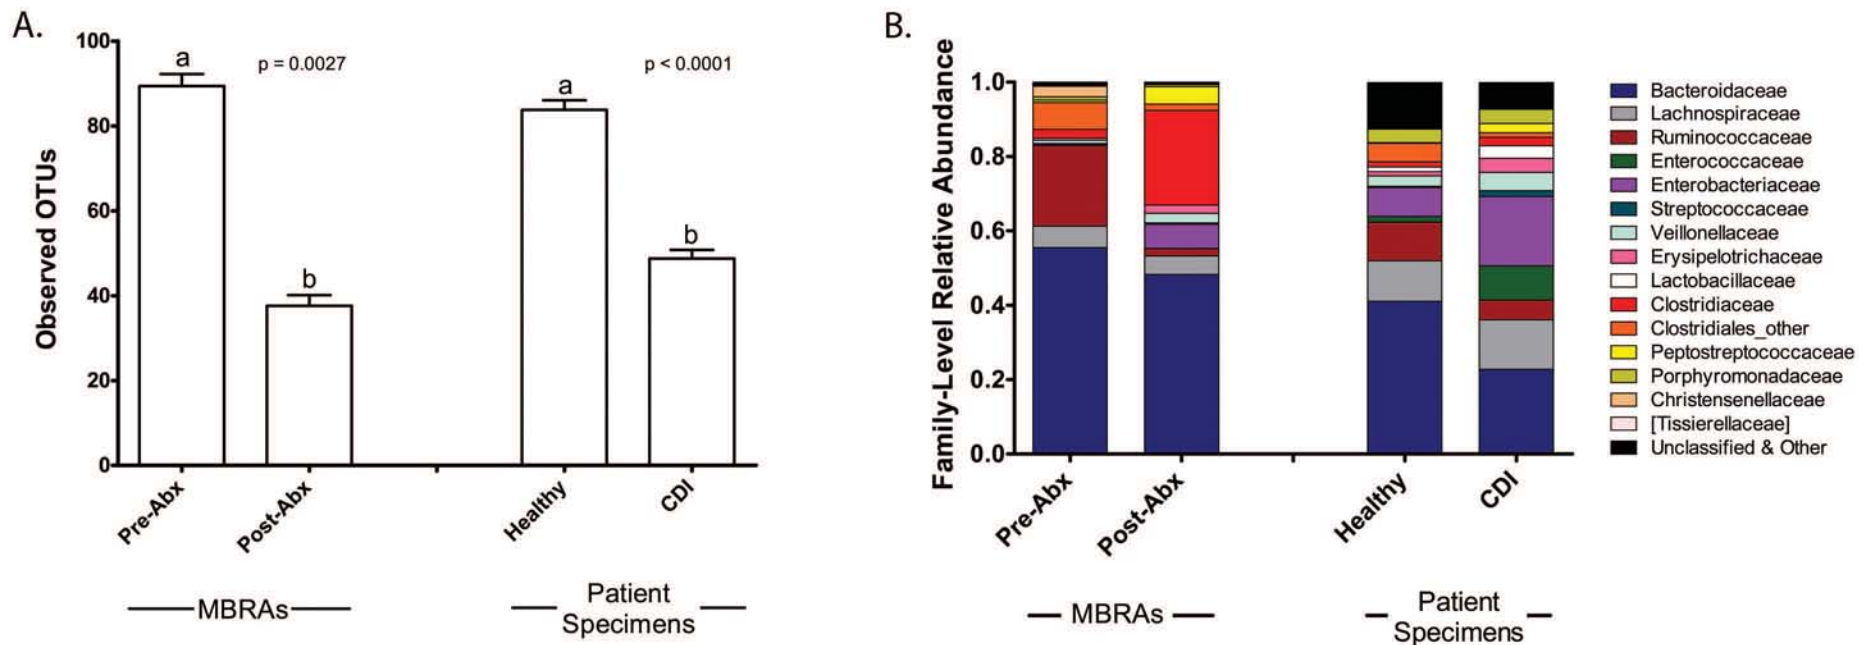

**Figure S3. Antibiotic treatment of human fecal MBRAs results in community dynamics mimicking CDI.**

(A) Antibiotic treatment of MBRAs results in a significant loss in observed species similar to that seen when comparing differences in feces of healthy adults to patients with CDI. Significance was determined by the Mann-Whitney U test. (B) Taxonomic summary illustrating similar family-level relative abundance changes in microbiomes before and after antibiotic treatment (MBRAs) and in feces from healthy subjects (Healthy) or patients with CDI (CDI).
